# Supplementary material for: Alberta Spinal Muscular Atrophy Newborn Screening—Results from Year 1 Pilot Project
Source: MDPI journal article supplement (doi:10.3390/ijns9030042), 2023-07-27
Supplement: s1 [file s1]

*Supplementary Materials*

**Table S1.** Sequences of Primers and Probes Used in the Multiplex PCR Assay for Newborn Screening of SMA.

| Primer/Probe     | Oligo Sequence                                       |
|------------------|------------------------------------------------------|
| TREC_F           | 5'- TGC TGA CAC CTC TGG TTT TTG TAA -3'              |
| TREC_R           | 5'- GTG CCA GCT GCA GGG TTT AG -3'                   |
| TREC_Probe FAM   | 5'- /FAM/ ATG CAT AGG CAC CTG C /MGBNFQ -3'          |
|                  |                                                      |
| RPP30_F          | 5'- AGA TTT GGA CCT GCG AGC G -3'                    |
| RPP30_R          | 5'- GAG CGG CTG TCT CCA CAA GT -3'                   |
| RNaseP_Probe VIC | 5'- /VIC/ TTC TGA CCT GAA GGC TCT GCG CG /MGBNFQ -3' |
|                  |                                                      |
| SMN1_F           | 5'- CTT GTG AAA CAA AAT GCT TTT TAA CAT CCA T -3'    |
| SMN1_R           | 5'- GAA TGT GAG CAC CTT CCT TCT TTT T -3'            |
| SMN1_Probe ABY   | 5'- /ABY/ AGG +GTT +T+C+A +GAC /MGBNFQ/ -3'          |
| SMN2_Blocker     | 5'- AG+G +GTT +T+T+A +GAC -3'                        |

**Table S2.** List of controls used during the validation: *SMN1* copy number was determined using MLPA before being used for validation purposes.

| Sample         | SMN1 Copy Number | SMN2 Copy Number | Status  |
|----------------|------------------|------------------|---------|
| 1001           | 0                | 3                | Patient |
| 1002           | 1                | 2                | Carrier |
| 1003           | 1                | 3                | Carrier |
| 1004           | 1                | 3                | Carrier |
| 1005           | 1                | 2                | Carrier |
| 1006           | 0                | 3                | Patient |
| 1007           | 1                | 2                | Carrier |
| 1008           | 0                | 2                | Patient |
| 1009           | 1                | 3                | Carrier |
| 1010           | 1                | 2                | Carrier |
| 1011           | 0                | 3                | Patient |
| 1012           | 0                | 4                | Patient |
| 1013           | 0                | 3                | Patient |
| 1014           | 0                | 2                | Patient |
| 1015           | 0                | 3                | Patient |
| 1016           | 0                | 3                | Patient |
| 1017           | 0                | 3                | Patient |
| 1018           | 0                | 3                | Patient |
| 1019           | 1                | 2                | Carrier |
| 1020           | 0                | 3                | Patient |
| 1021           | 1                | 2                | Carrier |
| 1022           | 1                | 3                | Carrier |
| 1023           | 0                | 4                | Patient |
| 1024           | 2                | 4                | Normal  |
| 1025           | 1                | 1                | Carrier |
| 1026           | 1                | 3                | Carrier |
| 1027           | 1                | 1                | Carrier |
| 1028           | 0                | 2                | Patient |
| 1029           | 0                | 3                | Patient |
| 1030           | 1                | 3                | Carrier |
| 1031           | 0                | 4                | Patient |
| 1032           | 1                | 3                | Carrier |
| 1033           | 1                | 3                | Carrier |
| 1034           | 1                | 1                | Carrier |
| 1035           | 1                | 1                | Carrier |
| 1036           | 0                | 3                | Patient |
| 1037           | 2                | 1                | Normal  |
| 1038           | 0                | 3                | Patient |
| 2001           | 0                | 3                | Patient |
| 2002           | 1                | 2                | Carrier |
| 2003           | 1                | 3                | Carrier |
| 2005           | 1                | 2                | Carrier |
| 2006           | 0                | 3                | Patient |
| SMA Control 1  | 2                | 2                | Normal  |
| SMA Control 2  | 2                | 2                | Normal  |
| SMA Control 3  | 2                | 2                | Normal  |
| SMA Control 4  | 2                | not determined   | Normal  |
| SMA Control 5  | 2                | not determined   | Normal  |
| SMA Control 6  | 2                | not determined   | Normal  |
| SMA Control 7  | 2                | not determined   | Normal  |
| SMA Control 8  | 2                | not determined   | Normal  |
| SMA Control 9  | 2                | not determined   | Normal  |
| SMA Control 10 | 2                | not determined   | Normal  |
| SMA Control 11 | 2                | not determined   | Normal  |
| SMA Control 12 | 2                | not determined   | Normal  |
| SMA Control 13 | 2                | not determined   | Normal  |

**Table S4.** The MLPA analysis of the 5 cases that screened positive showed a homozygous deletion of exon 7 in the *SMN1* gene. All of the cases had 3 copies of *SMN2*.

| Sample | SMN1 exon 7 ratio | SMN2 exon 7 ratio | MLPA* results                                                                        |
|--------|-------------------|-------------------|--------------------------------------------------------------------------------------|
| Case 1 | 5.21              | 148.5             | 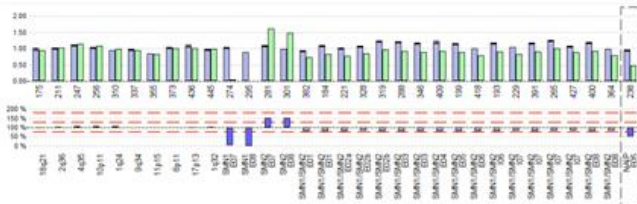   |
| Case 2 | 0                 | 145.09            |    |
| Case 3 | 5.73              | 143.43            |    |
| Case 4 | 0                 | 144.89            |   |
| Case 5 | 8.89              | 144.43            |  |

\*MRC Holland Probemix P021 version B1; JSI Sequence Pilot MLPA module.

**Table S5.** CT values for obtained for the false positive in three separate collections.

|              | <i>SMN1</i> CT | <i>RPP30</i> CT | TREC CT |
|--------------|----------------|-----------------|---------|
| Collection 1 | undetermined   | 26.91           | 36.69   |
| Collection 2 | 27.80          | 25.33           | 32.25   |
| Collection 3 | 28.49          | 27.72           | 32.58   |
