# Supplementary material for: Alberta Spinal Muscular Atrophy Newborn Screening—Results from Year 1 Pilot Project
Source: Int J Neonatal Screen. 2023 Jul 27;9(3):42. doi: 10.3390/ijns9030042 (PMC10443376; doi:10.3390/ijns9030042)
Supplement: Supplementary file 1 [file IJNS-09-00042-s001.zip › IJNS-2463316 supplementary table S3.xlsx]

## Sheet: Int. Pre.
jm-Janette Muir completed testing						kb-Kelly Baptista Wyatt completed testing
	Technician A				Technician B
	Repeat 1	repeat 2	repeat 3	repeat 4	Repeat 1	repeat 2	repeat 3	repeat 4	averages
Sample Name	SMA CT	SMA CT	SMA CT	SMA CT	SMA CT	SMA CT	SMA CT	SMA CT	Technician A	Technician B		Anova: Single Factor
201611280002	27.029	28.264	28.264	27.976	28.473	27.228	27.472	27.834	27.8833	27.7518
201611280003	26.556	26.514	26.514	26.02	26.314	25.726	26.757	26.115	26.401	26.228		SUMMARY
201611280004	26.228	26.327	26.327	26.389	25.663	24.995	26.41	25.164	26.3178	25.558		Groups	Count	Sum	Average	Variance
201611280005	27.071	27.098	27.098	27.134	26.457	26.159	26.76	26.256	27.1002	26.408		jm	94	2485.87	26.4454	1.94171
201611280006	26.258	26.195	26.195	25.641	25.839	25.455	26.538	25.706	26.0722	25.8845		kb	94	2518.54	26.793	1.90501
201611280008	26.007	25.982	25.982	25.881	25.553	25.302	26.369	25.724	25.963	25.737
201611280010	28.126	27.701	27.701	27.673	27.08	27.238	28.246	27.643	27.8002	27.5517
201611280013	27.103	26.137	26.137	27.207	26.853	26.889	27.983	26.688	26.646	27.1033		ANOVA
201611280014	25.187	25.624	25.624	26.504	26.892	25.088	26.985	24.149	25.7348	25.7785		Source of Variation	SS	df	MS	F	P-value	F crit
201611280015	26.172	25.592	25.592	26.826	25.997	25.85	29.822	25.962	26.0455	26.9078		Between Groups	5.67746	1	5.67746	2.95185	0.0874437	3.89194
201611280021	25.097	25.573	25.573	25.733	25.6	24.498	27.09	26.546	25.494	25.9335		Within Groups	357.745	186	1.92336
201611280024		25.119	25.119	28.354	26.693	26.716	30.549	27.72	26.1973	27.9195
201611280025	26.159	27.019	27.019	27.446	26.222	26.007	27.662	26.609	26.9108	26.625		Total	363.422	187
201611280026	27.133	28.018	28.018	27.933	27.218	26.921	28.775	27.38	27.7755	27.5735
201611280029	25.54	26.798	26.798	27.095	25.836	26.745	27.563	32.367	26.5577	28.1277
201611280032	25.225	25.481	25.481	26.724	25.279	25.407	25.446	34.759	25.7278	27.7228		Intermediate precision/ Inter-run repeatability - assessed by two technologist testing the same 96 samples. Each technologist completed four plates over the course of one month. 100% Inter-run concordance based on reference range calls.
201611280033	26.479	26.217	26.217	26.399	26.923	27.469	27.723		26.328	27.3717
201611280035	24.692	24.94	24.94	25.456	26.526	24.768	25.543	26.213	25.007	25.7625
201611280037	25.008	26.118	26.118	26.99	26.336	26.448	26.932	25.809	26.0585	26.3812
201611280044	25.544	27.069	27.069	27.809	26.979	26.904	32.878	26.986	26.8727	28.4367
201611280051	24.903	25.606	25.606	26.007	26.961	24.769	26.662	26.061	25.5305	26.1133
201611280052	27.539	26.587	26.587	28.198	28.063	27.542	31.285	28.298	27.2278	28.797
201611280057	25.547	25.005	25.005	25.534	25.881	25.314	28.674	26.187	25.2728	26.514
201611280058	27.038	25.871	25.871	27.894	27.491	27.546	28.229	27.239	26.6685	27.6262
201611280060	28.973	28.103	28.103	28.153	27.527	28.236	28.818	28.221	28.333	28.2005
201611280070	25.215	26.774	26.774	25.935	27.241	26.427	27.429		26.1745	27.0323
201611280072	24.122	25.224	25.224	24.735	26.301	24.683	25.846		24.8263	25.61
201611280074	26.725	26.139	26.139	27.358	27.031	26.673	26.272		26.5903	26.6587
201611280076	24.614	26.584	26.584	26.604	25.772	26.202	26.889	26.246	26.0965	26.2772
201611280077	27.574	28.263	28.263	28.067	27.637	28.911	29.915	28.004	28.0418	28.6167
201611280078	25.527	26.917	26.917	26.93	26.197	26.598	27.636	27.184	26.5727	26.9037
201611280079	25.984	25.623	25.623		27.015	26.436	27.117	26.75	25.7433	26.8295
201611280080	27.066	24.81	24.81	26.948	25.75	26.019	27.485	26.386	25.9085	26.41
201611280083	25.376	25.593	25.593	26.625	26.684	26.028	27.374	25.753	25.7967	26.4597
201611280084	26.92	25.541	25.541	25.996	26.962	25.546	27.583	26.069	25.9995	26.54
201611280086	27.658	25.505	25.505	26.597	25.956	26.129	27.274	26.116	26.3162	26.3688
201611280087	27.47	26.47	26.47	27.535	26.211	26.788	27.668		26.9862	26.889
201611280089	27.831	29.479	29.479	28.651	28.294		30.36		28.86	29.327
201611280090	23.973	23.902	23.902	25.226	25.891		25.912		24.2508	25.9015
201611280091	26.668	27.718	27.718	28.555	28.085		28.023		27.6647	28.054
201611280093	27.159	26.81	26.81	26.296	27.07	26.85	27.81	27.188	26.7687	27.2295
201611280094	24.772	25.454	25.454	26.571	25.967	25.702	26.715	26.589	25.5628	26.2432
201611280095	27.194	27.136	27.136	28.101	27.32	26.672	27.494	27.465	27.3917	27.2378
201611280096	26.591	26.393	26.393	27.177	27.016	25.119	26.863	26.976	26.6385	26.4935
201611280108	26.863	27.222	27.222	27.978	26.334	26.456	28.697	27.799	27.3212	27.3215
201611280114	24.722	25.611	25.611	25.984	25.606	25.229	27.681	26.653	25.482	26.2923
201611280115	27.114	26.687	26.687	27.469	27.278	27.127	27.594	27.48	26.9892	27.3697
201611280116	26.829	24.986	24.986	27.032	24.815	24.917	28.622	27.077	25.9582	26.3577
201611280117		26.415	26.415	27.071	26.681	26.465	27.352		26.6337	26.8327
201611280118	25.264	26.05	26.05	27.289	25.812		26.507	30.547	26.1633	27.622
201611280120	25.756	25.628	25.628	26.808	26.121	26.294	25.744	32.356	25.955	27.6287
201611280121	25.568	25.79	25.79	26.838	26.551		25.929		25.9965	26.24
201611280123	25.924	26.795	26.795	25.602	27.198	26.378	26.856	26.601	26.279	26.7583
201611280124	28.378	27.149	27.149		29.121	27.114	28.335	28.094	27.5587	28.166
201611280125	26.221	25.458	25.458	24.368	25.526	24.117	25.817	25.59	25.3762	25.2625
201611280126	24.813	25.319	25.319	26.06	26.585	24.985	27.086	26.073	25.3777	26.1823
201611280127	26.102	25.057	25.057	24.158	24.638	25.545	26.404	24.93	25.0935	25.3792
201611280128	24.524	24.434	24.434	27.371	24.37	24.891	26.561	26.025	25.1907	25.4618
201611280129	24.281	24.644	24.644		24.414	24.554	25.53	25.357	24.523	24.9638
201611280131	26.984	25.4	25.4		26.025	25.059	27.162	27.033	25.928	26.3198
201611280132	29.69	28.571	28.571	29.179	27.887	27.6	28.383	27.65	29.0028	27.88
201611280134	28.443	28.988	28.988	29.852	28.907	30.949	29.583		29.0678	29.813
201611280135	26.82	26.938	26.938	27.674	27.436		27.747	27.659	27.0925	27.614
201611280137	25.75	25.856	25.856	26.261	26.868	33.023	25.612	24.432	25.9307	27.4838
201611280141	25.571	24.619	24.619	25.854	25.871	24.299	24.88	24.037	25.1657	24.7717
201611280142	24.974	24.244	24.244		23.939	24.011	24.953	25.082	24.4873	24.4963
201611280144	26.802	26.09	26.09		26.121	25.761	27.152	26.141	26.3273	26.2937
201611280145	26.695	25.962	25.962		26.409	25.951	27.078	26.444	26.2063	26.4705
201611280146	25.042	26.688	26.688	26.149	26.106	26.07	26.743	26.736	26.1418	26.4138
201611280147	25.791	25.269	25.269	26.409	24.453	24.406	25.675	25.984	25.6845	25.1295
201611280150	27.151	25.977	25.977	28.071	26.292	25.897	28.82	27.544	26.794	27.1382
201611280151	23.715	24.027	24.027	26.208	24	25.095	25.99	26.054	24.4943	25.2847
201611280152	27.87	27.273	27.273	26.58	26.873	26.605	27.724	27.035	27.249	27.0592
201611280153	24.901	26.147	26.147	25.244	26.842	25.525	27.165	26.754	25.6097	26.5715
201611280154	25.882	25.144	25.144	26.366	25.696	24.168	26.118	26.424	25.634	25.6015
201611280155	25.517	24.894	24.894	26.409	25.216	24.844	26.011	25.412	25.4285	25.3708
201611280156	26.149	25.41	25.41	25.622	26.56	25.291	25.707	25.523	25.6477	25.7702
201611280157	26.616	26.032	26.032	26.476	26.391	25.768	25.597	26.213	26.289	25.9922
201611280160	26.89	26.283	26.283	26.871	27.235	25.969	27.461	26.63	26.5817	26.8237
201611280161	25.343	24.992	24.992	24.783	26.013	24.89	24.341	24.563	25.0275	24.9518
201611280163	26.763	25.415	25.415	26.621	26.235	25.305	27.405	26.091	26.0535	26.259
201611280166	27.131	25.796	25.796	27.867	27.108	26.017	27.851	25.465	26.6475	26.6103
201611280167	25.648	26.583	26.583	25.462	26.212	25.454	27.475	25.55	26.069	26.1727
201611280168	26.668	24.802	24.802	26.774	25.658	24.651	26.543	26.688	25.7615	25.885
201611280170	29.485	26.023	26.023	27.013	27.999	25.972	28.523	28.08	27.136	27.6435
201611280176	26.117	24.941	24.941	25.336	25.576	24.82	25.562	25.11	25.3337	25.267
TREC_TLC_2004_oct4	26.945	27.075	27.075	27.283	27.034	26.711	27.262	26.694	27.0945	26.9253
TREC_THC_2004_oct4	27.329	27.139	27.139	27.335	28.075	26.545	27.947	27.145	27.2355	27.428
TREC_TDC_2021_C	26.486	26.801	26.801	26.974	26.902	26.587	26.721	26.473	26.7655	26.6708
2005-SMN1 1 copy	27.996	28.205	28.205	28.935	27.915	28.5	28.489	28.323	28.3352	28.3068
Normal control 5	26.279	27.075	27.075	26.143	25.711	25.949	26.949	25.98	26.643	26.1472
SMA_REXC_28OCT21	26.535	26.771	26.771	26.491	26.569	26.478	27.55	26.94	26.642	26.8842
TREC_TEXC_MAY21_oct4	25.947	26.589	26.589	26.369	26.11	26.747		26.239	26.3735	26.3653
Filter blank	35.879		35.648	36.391	35.016	36.022	35.812	36.303	35.9727	35.7882
1001-SMN1 0 copy	Undetermined		Undetermined	Undetermined	Undetermined	Undetermined	Undetermined	Undetermined
NTC	37.856		Undetermined	Undetermined	38.691	Undetermined	37.655	Undetermined

## Sheet: Repeatability
		Repeatability - Intra-run repeatability was assessed by comparing 14 DBS plus 10 controls in quadruple on one run. 100% Intra-run concordance.
		N	90
		SMA CT by Sample Name	N	Mean	Mean SE	SD
		1013-SMN1 0 copy	3	45	0	0
		NTC	4	43.7223	1.27775	2.5555
		Filter blank	4	36.8735	0.510629	1.02126
		Normal control 3	3	26.158	0.164123	0.284269
		SMA1 1 copy 5710	3	28.7727	0.650719	1.12708
		SMA_REXC_28OCT21	4	26.69	0.159239	0.318479
		TREC_TDC_2021_C	4	27.183	0.169491	0.338982
		TREC_TEXC_MAY21_oct4	4	26.2365	0.0477746	0.0955493
		TREC_THC_2004_oct4	4	27.1537	0.172874	0.345748
		TREC_TLC_2004_oct4	4	27.0502	0.137564	0.275127
		201612200022	4	27.519	0.318703	0.637406
		201612200024	4	25.6125	0.436219	0.872439
		201612200025	4	26.7843	0.314508	0.629015
		201612200026	4	25.2252	0.380608	0.761217
		201612200027	4	25.2643	0.46884	0.937679
		201612200033	3	26.4887	0.417961	0.72393
		201612200035	3	25.7377	0.511587	0.886094
		201612200037	3	25.6573	0.365674	0.633366
		201612200041	4	25.692	0.331775	0.66355
		201612200044	4	26.0915	0.463098	0.926195
		201612200045	4	27.1255	0.405706	0.811412
		201612200047	4	26.6655	0.270163	0.540327
		201612200049	4	26.5665	0.190356	0.380713
		201612200251	4	27.621	0.0746737	0.149347
		SMA CT by Sample Name	Minimum	1st Quartile	Median	95% CI		3rd Quartile	Maximum
		1013-SMN1 0 copy	45	45	45	-	-	45	45
		NTC	39.889	42.0186	45	-	-	45	45
		Filter blank	35.903	36.1438	36.6465	-	-	37.6788	38.298
		Normal control 3	25.83	25.9102	26.311	-	-	26.3293	26.333
		SMA1 1 copy 5710	27.638	27.8297	28.788	-	-	29.708	29.892
		SMA_REXC_28OCT21	26.288	26.4518	26.703	-	-	26.9239	27.066
		TREC_TDC_2021_C	26.778	26.8992	27.1915	-	-	27.4639	27.571
		TREC_TEXC_MAY21_oct4	26.11	26.1571	26.2515	-	-	26.3109	26.333
		TREC_THC_2004_oct4	26.677	26.8674	27.237	-	-	27.4123	27.464
		TREC_TLC_2004_oct4	26.64	26.8575	27.166	-	-	27.2044	27.229
		201612200022	26.622	26.9903	27.738	-	-	27.9747	27.978
		201612200024	24.699	24.8507	25.6055	-	-	26.3767	26.54
		201612200025	26.158	26.2368	26.7625	-	-	27.339	27.454
		201612200026	24.601	24.6718	25.003	-	-	25.8528	26.294
		201612200027	24.295	24.4379	25.2855	-	-	26.0835	26.191
		201612200033	25.723	25.866	26.581	-	-	27.0652	27.162
		201612200035	24.728	24.9565	26.099	-	-	26.3382	26.386
		201612200037	24.926	25.1082	26.019	-	-	26.0257	26.027
		201612200041	24.758	25.2022	25.8415	-	-	26.132	26.327
		201612200044	24.772	25.3449	26.3735	-	-	26.7441	26.847
		201612200045	25.965	26.4833	27.3645	-	-	27.688	27.808
		201612200047	25.901	26.226	26.824	-	-	27.0522	27.113
		201612200049	26.009	26.2715	26.712	-	-	26.813	26.833
		201612200251	27.414	27.5065	27.6505	-	-	27.7257	27.769

## Sheet: Robustness
RNaseP								SMA
DAY								DAY
Day 0	Day 3	Day 5	Day 7	Day 10				Day 0	Day 3	Day 5	Day 7	Day 10
25.615	24.586	24.783	24.9823	25.3093				27.915	26.108	26.564	26.394	26.7877
26.023	25.028	25.809	25.3857	25.3627				27.751	27.473	28.23	27.332	27.4383
25.109	23.964	23.629	25.0447	24.9913				26.923	25.779	25.769	26.279	26.926
24.066	24.309	24.718	24.131	27.672				25.483	26.106	26.163	25.5147	28.581
25.183	25.016	25.005	25.0447	25.236				27.709	28.254	27.326	27.325	27.022
25.069	24.367	23.915	24.1603	24.154				27.371	25.679	25.827	25.6973	26.062
25.122	23.092	20.818	23.168	24.2957				26.285	24.241	23.279	24.085	25.1317
25.292	25.134	24.422	25.0153	24.52				27.709	26.583	25.664	26.871	26.4443
24.95	23.677	23.293	24.1553	24.4977				26.328	24.975	25.226	25.4273	26.0933
25.287	24.717	25.084	25.26	25.354				27.584	26.113	26.706	26.7173	27.4187
24.86	24.06	22.999	24.2693	24.8103				26.546	25.473	24.857	25.674	26.4337
25.398	24.078	24.735	24.8507	25.2847				27.238	25.791	26.269	26.572	26.9793
24.762	23.787	23.662	23.5677	24.037				26.857	25.417	25.581	25.2107	25.4073
23.918	23.359	23.275	23.4057	24.3015				25.945	25.974	25.922	25.227	25.816
24.189	23.471	24.204	23.7523	23.985				25.574	25.425	26.018	24.978	25.152
25.338	23.759		24.9567					28.449	27.503		28.008
24.819	23.374		24.5913	24.0715				26.328	24.943		25.9363	25.051
25.539	25.002	23.551	24.888	24.724				27.006	26.406	25.549	26.2627	26.0053
25.686	24.637	25.768	24.9893	25.2117				26.916	26.334	27.607	26.426	26.5657
25.721	23.193	25.657	23.7093	23.865				27.143	25.104	27.549	24.9153	25.0743
26.23	25.825	25.156	25.9473	25.2643				27.761	27.305	26.667	27.1407	26.4223
27.309	26.201	25.707	25.2863	26.8063				28.812	27.496	27.279	26.3703	27.8163
25.521		26.098	19.9917	21.146				27.644		29.014	23.111	23.9737
25.718	25.604	25.689	26.1663	25.811				26.789	26.983	27.184	27.2357	26.828
24.867	24.368	24.312	24.5543	24.8107				26.085	26.025	26.366	25.7373	25.904
24.722	24.365	24.864	24.7747	25.558				26.15	26.193	26.697	25.9657	26.8393
26.015	25.559	25.041	25.3007	25.6267				27.258	27.347	27.485	26.7063	26.8657
25.709	24.957	26.106	25.2583	26.23				27.313	26.972	28.056	26.5897	27.4267
25.703	24.714	24.318	24.8527	25.3087				27.329	26.311	26.755	26.1247	26.66
25.88	25.293	25.254	25.4287	25.8643				27.002	26.982	27.184	26.6287	27.292
26.068	24.669		25.303	26.072				27.89	26.28	28.223	26.49	27.5037
Robustness - Comparison of master mix age when kept at 4°C. The length of time the mastermix has been validated for use and when kept at 4°C, has been found to be “10 days”.

## Sheet: Reproducibility
			601 1st
Well Position	Sample Name	Target Name	CT			Reproducibility - Ten SMA specific EQA samples from 2021 and 35 TREC EQA samples analyzed plus controls. Based on the reference range and cutoffs, all results obtained are correct as per EQA.
C17	2011501	RNASEP	24.416
C17	2011501	SMA	25.743
C19	2011502	RNASEP	34.926
C19	2011502	SMA	36.003
C21	2011503	RNASEP	24.976
C21	2011503	SMA	26.766
C23	2011504	RNASEP	35.072
C23	2011504	SMA	36.912
E1	2011505	RNASEP	24.117
E1	2011505	SMA	25.569
G9	20211015001	RNASEP	26.293
G9	20211015001	SMA	27.526
G11	20211015002	RNASEP	26.032
G11	20211015002	SMA	27.425
G13	20211015003	RNASEP	25.44
G13	20211015003	SMA	27.272
G15	20211015004	RNASEP	26.93
G15	20211015004	SMA	28.256
G17	20211015005	RNASEP	36.066
G17	20211015005	SMA	39.177
A1	20212017001	RNASEP	21.615
A1	20212017001	SMA	40
A3	20212017002	RNASEP	22.343
A3	20212017002	SMA	24.812
A5	20212017003	RNASEP	15.884
A5	20212017003	SMA	40
A7	20212017004	RNASEP	31.867
A7	20212017004	SMA	36.746
A9	20212017005	RNASEP	22.821
A9	20212017005	SMA	40
E23	20214015001	RNASEP	26.798
E23	20214015001	SMA	28.07
G1	20214015002	RNASEP	34.841
G1	20214015002	SMA	37.363
G3	20214015003	RNASEP	15.067
G3	20214015003	SMA	23.883
G5	20214015004	RNASEP	17.191
G5	20214015004	SMA	24.245
G7	20214015005	RNASEP	25.797
G7	20214015005	SMA	26.882
A11	20214017001	RNASEP	23.526
A11	20214017001	SMA	24.769
A13	20214017002	RNASEP	22.782
A13	20214017002	SMA	40
A15	20214017003	RNASEP	21.965
A15	20214017003	SMA	24.624
A17	20214017004	RNASEP	24.556
A17	20214017004	SMA	40
A19	20214017005	RNASEP	21.175
A19	20214017005	SMA	24.791
I5	1003-SMN1 1 copy	RNASEP	24.288
I5	1003-SMN1 1 copy	SMA	27.753
I3	1006-SMN1 0 copy	RNASEP	24.373
I3	1006-SMN1 0 copy	SMA	31.439
I19	A	RNASEP	34.243
I19	A	SMA	37.789
I11	FB Nov21	RNASEP	30.72
I11	FB Nov21	SMA	32.498
I17	FB Nov21	RNASEP	31.448
I17	FB Nov21	SMA	33.757
I1	Normal control 12	RNASEP	15.391
I1	Normal control 12	SMA	23.053
I7	SMA_REXC_28OCT21	RNASEP	26.116
I7	SMA_REXC_28OCT21	SMA	27.78
I15	SMA_REXC_28OCT21	RNASEP	25.493
I15	SMA_REXC_28OCT21	SMA	26.857
I21	SMA1 1 copy 5710	RNASEP	23.242
I21	SMA1 1 copy 5710	SMA	25.202
I23	SMA1 1 copy 5712	RNASEP	26.686
I23	SMA1 1 copy 5712	SMA	30.116
G23	TREC_TDC_2021_C	RNASEP	26.366
G23	TREC_TDC_2021_C	SMA	27.801
I9	TREC_TEXC_MAY21_oct4	RNASEP	25.212
I9	TREC_TEXC_MAY21_oct4	SMA	26.429
I13	TREC_TEXC_MAY21_oct4	RNASEP	24.932
I13	TREC_TEXC_MAY21_oct4	SMA	26.416
G21	TREC_THC_2004_oct4	RNASEP	24.846
G21	TREC_THC_2004_oct4	SMA	26.42
G19	TREC_TLC_2004_oct4	RNASEP	24.973
G19	TREC_TLC_2004_oct4	SMA	26.799
A21	TRECP_20204015001	RNASEP	24.896
A21	TRECP_20204015001	SMA	26.173
A23	TRECP_20204015002	RNASEP	31.965
A23	TRECP_20204015002	SMA	35.011
C1	TRECP_20204015003	RNASEP	23.036
C1	TRECP_20204015003	SMA	27.128
C5	TRECP_20204015004	RNASEP	25.975
C5	TRECP_20204015004	SMA	27.153
C3	TRECP_20204015005	RNASEP	26.451
C3	TRECP_20204015005	SMA	28.053
E13	TRECP_319R1	RNASEP	26.333
E13	TRECP_319R1	SMA	27.824
E15	TRECP_319R2	RNASEP	25.816
E15	TRECP_319R2	SMA	28.003
E17	TRECP_319R3	RNASEP	37.088
E17	TRECP_319R3	SMA	38.837
E19	TRECP_319R4	RNASEP	24.023
E19	TRECP_319R4	SMA	26.129
E21	TRECP_319R5	RNASEP	25.972
E21	TRECP_319R5	SMA	27.482
E3	TRECP_419R1	RNASEP	24.396
E3	TRECP_419R1	SMA	26.6
E5	TRECP_419R2	RNASEP	35.45
E5	TRECP_419R2	SMA	37.567
E7	TRECP_419R3	RNASEP	26.154
E7	TRECP_419R3	SMA	26.855
E9	TRECP_419R4	RNASEP	26.225
E9	TRECP_419R4	SMA	28.239
E11	TRECP_419R5	RNASEP	25.412
E11	TRECP_419R5	SMA	26.744
C9	TREP_2021305001	RNASEP	16.454
C9	TREP_2021305001	SMA	24.082
C7	TREP_2021305002	RNASEP	35.224
C7	TREP_2021305002	SMA	40.067
C13	TREP_2021305003	RNASEP	26.785
C13	TREP_2021305003	SMA	27.832
C15	TREP_2021305004	RNASEP	26.637
C15	TREP_2021305004	SMA	27.96
C11	TREP_2021305005	RNASEP	22.918
C11	TREP_2021305005	SMA	25.503

## Sheet: Lim. Blank
FB = filter blank
N = 2 copy normal
Note: undetermined was changed to 45 so the calculations wouldn't give an error
OVERALL (so far)	Number of samples	Mean	SD	Median	Min	Max
FB_RNASEP CT	121	36.1112	1.43827	35.87	32.62	39.3
FB_SMA CT	121	38.0514	2.06244	37.5	34.64	42.41
N_RNASEP CT	124	25.1428	0.600927	25.18	22.75	26.49
N_SMA CT	124	26.4942	0.669526	26.36	24.37	28.83
Limit of the Blank – well to well carryover. 121 filter blank and 124 normal known 2 copy SMN1 samples applied. Three qPCR assays, one plate per assay were completed. All SMA and RNaseP controls used. Values above the detectable limit of the instrument are given an ‘undetermined’ value. Undetermined values were modified to the highest detected CT for each analyte for the purposes of the limit of …
